# Supplementary material for: Automatic modular design of robot swarms using behavior trees as a control architecture
Source: PeerJ Comput Sci. 2020 Nov 9;6:e314. doi: 10.7717/peerj-cs.314 (PMC7924474; doi:10.7717/peerj-cs.314)
Supplement: Supplemental Information 1 [file peerj-cs-06-314-s001.csv]

	MethodOrVariant	Environment	Study	Mission	Budget	Seed	Score
1	Chocolate	Simulation	1	agg	50k	6715	0.75
2	Chocolate	Simulation	1	agg	50k	1877	0.55
3	Chocolate	Simulation	1	agg	50k	7070	0.7
4	Chocolate	Simulation	1	agg	50k	5633	0.4
5	Chocolate	Simulation	1	agg	50k	1526	0.75
6	Chocolate	Simulation	1	agg	50k	1016	0.55
7	Chocolate	Simulation	1	agg	50k	6207	0.6
8	Chocolate	Simulation	1	agg	50k	9646	0.8
9	Chocolate	Simulation	1	agg	50k	763	0.75
10	Chocolate	Simulation	1	agg	50k	2947	0.55
11	Maple	Simulation	1	agg	50k	6715	0.65
12	Maple	Simulation	1	agg	50k	1877	0.5
13	Maple	Simulation	1	agg	50k	7070	0.8
14	Maple	Simulation	1	agg	50k	5633	0.35
15	Maple	Simulation	1	agg	50k	1526	0.55
16	Maple	Simulation	1	agg	50k	1016	0.85
17	Maple	Simulation	1	agg	50k	6207	0.55
18	Maple	Simulation	1	agg	50k	9646	0.3
19	Maple	Simulation	1	agg	50k	763	0.45
20	Maple	Simulation	1	agg	50k	2947	0.7
21	EvoStick	Simulation	1	agg	50k	6715	0.85
22	EvoStick	Simulation	1	agg	50k	1877	0.95
23	EvoStick	Simulation	1	agg	50k	7070	0.75
24	EvoStick	Simulation	1	agg	50k	5633	0.9
25	EvoStick	Simulation	1	agg	50k	1526	0.75
26	EvoStick	Simulation	1	agg	50k	1016	0.6
27	EvoStick	Simulation	1	agg	50k	6207	0.6
28	EvoStick	Simulation	1	agg	50k	9646	0.55
29	EvoStick	Simulation	1	agg	50k	763	0.65
30	EvoStick	Simulation	1	agg	50k	2947	0.85
31	Maple	Reality	1	agg	50k	6715	0.45
32	Maple	Reality	1	agg	50k	1877	0.65
33	Maple	Reality	1	agg	50k	7070	0.25
34	Maple	Reality	1	agg	50k	5633	0.45
35	Maple	Reality	1	agg	50k	1526	0.55
36	Maple	Reality	1	agg	50k	1016	0.4
37	Maple	Reality	1	agg	50k	6207	0.4
38	Maple	Reality	1	agg	50k	9646	0.2
39	Maple	Reality	1	agg	50k	763	0.45
40	Maple	Reality	1	agg	50k	2947	0.4
41	Chocolate	Reality	1	agg	50k	6715	0.45
42	Chocolate	Reality	1	agg	50k	1877	0.55
43	Chocolate	Reality	1	agg	50k	7070	0.5
44	Chocolate	Reality	1	agg	50k	5633	0.45
45	Chocolate	Reality	1	agg	50k	1526	0.55
46	Chocolate	Reality	1	agg	50k	1016	0.6
47	Chocolate	Reality	1	agg	50k	6207	0.3
48	Chocolate	Reality	1	agg	50k	9646	0.45
49	Chocolate	Reality	1	agg	50k	763	0.55
50	Chocolate	Reality	1	agg	50k	2947	0.25
51	EvoStick	Reality	1	agg	50k	6715	0.35
52	EvoStick	Reality	1	agg	50k	1877	0
53	EvoStick	Reality	1	agg	50k	7070	0.15
54	EvoStick	Reality	1	agg	50k	5633	0.35
55	EvoStick	Reality	1	agg	50k	1526	0.35
56	EvoStick	Reality	1	agg	50k	1016	0.1
57	EvoStick	Reality	1	agg	50k	6207	0.25
58	EvoStick	Reality	1	agg	50k	9646	0.3
59	EvoStick	Reality	1	agg	50k	763	0.4
60	EvoStick	Reality	1	agg	50k	2947	0.2
61	Chocolate	Simulation	1	forag	50k	6715	25
62	Chocolate	Simulation	1	forag	50k	1877	30
63	Chocolate	Simulation	1	forag	50k	7070	27
64	Chocolate	Simulation	1	forag	50k	5633	30
65	Chocolate	Simulation	1	forag	50k	1526	28
66	Chocolate	Simulation	1	forag	50k	1016	20
67	Chocolate	Simulation	1	forag	50k	6207	31
68	Chocolate	Simulation	1	forag	50k	9646	31
69	Chocolate	Simulation	1	forag	50k	763	31
70	Chocolate	Simulation	1	forag	50k	2947	26
71	Maple	Simulation	1	forag	50k	6715	26
72	Maple	Simulation	1	forag	50k	1877	30
73	Maple	Simulation	1	forag	50k	7070	31
74	Maple	Simulation	1	forag	50k	5633	21
75	Maple	Simulation	1	forag	50k	1526	25
76	Maple	Simulation	1	forag	50k	1016	27
77	Maple	Simulation	1	forag	50k	6207	30
78	Maple	Simulation	1	forag	50k	9646	19
79	Maple	Simulation	1	forag	50k	763	32
80	Maple	Simulation	1	forag	50k	2947	29
81	EvoStick	Simulation	1	forag	50k	6715	34
82	EvoStick	Simulation	1	forag	50k	1877	29
83	EvoStick	Simulation	1	forag	50k	7070	30
84	EvoStick	Simulation	1	forag	50k	5633	35
85	EvoStick	Simulation	1	forag	50k	1526	30
86	EvoStick	Simulation	1	forag	50k	1016	23
87	EvoStick	Simulation	1	forag	50k	6207	33
88	EvoStick	Simulation	1	forag	50k	9646	37
89	EvoStick	Simulation	1	forag	50k	763	24
90	EvoStick	Simulation	1	forag	50k	2947	27
91	Maple	Reality	1	forag	50k	6715	23
92	Maple	Reality	1	forag	50k	1877	23
93	Maple	Reality	1	forag	50k	7070	19
94	Maple	Reality	1	forag	50k	5633	24
95	Maple	Reality	1	forag	50k	1526	14
96	Maple	Reality	1	forag	50k	1016	20
97	Maple	Reality	1	forag	50k	6207	21
98	Maple	Reality	1	forag	50k	9646	24
99	Maple	Reality	1	forag	50k	763	28
100	Maple	Reality	1	forag	50k	2947	28
101	Chocolate	Reality	1	forag	50k	6715	26
102	Chocolate	Reality	1	forag	50k	1877	19
103	Chocolate	Reality	1	forag	50k	7070	16
104	Chocolate	Reality	1	forag	50k	5633	22
105	Chocolate	Reality	1	forag	50k	1526	18
106	Chocolate	Reality	1	forag	50k	1016	21
107	Chocolate	Reality	1	forag	50k	6207	20
108	Chocolate	Reality	1	forag	50k	9646	27
109	Chocolate	Reality	1	forag	50k	763	26
110	Chocolate	Reality	1	forag	50k	2947	23
111	EvoStick	Reality	1	forag	50k	6715	10
112	EvoStick	Reality	1	forag	50k	1877	1
113	EvoStick	Reality	1	forag	50k	7070	8
114	EvoStick	Reality	1	forag	50k	5633	11
115	EvoStick	Reality	1	forag	50k	1526	10
116	EvoStick	Reality	1	forag	50k	1016	0
117	EvoStick	Reality	1	forag	50k	6207	13
118	EvoStick	Reality	1	forag	50k	9646	9
119	EvoStick	Reality	1	forag	50k	763	19
120	EvoStick	Reality	1	forag	50k	2947	13
121	Maple	Simulation	2	agg	500	6715	0.35
122	Maple	Simulation	2	agg	500	1877	0
123	Maple	Simulation	2	agg	500	7070	0.3
124	Maple	Simulation	2	agg	500	5633	0.35
125	Maple	Simulation	2	agg	500	1526	0.1
126	Maple	Simulation	2	agg	500	1016	0.45
127	Maple	Simulation	2	agg	500	6207	0.45
128	Maple	Simulation	2	agg	500	9646	0.3
129	Maple	Simulation	2	agg	500	763	0.4
130	Maple	Simulation	2	agg	500	2947	0.5
131	Maple	Simulation	2	agg	500	4528	0.6
132	Maple	Simulation	2	agg	500	5718	0.45
133	Maple	Simulation	2	agg	500	2974	0.3
134	Maple	Simulation	2	agg	500	1997	0.6
135	Maple	Simulation	2	agg	500	9337	0.35
136	Maple	Simulation	2	agg	500	2034	0.5
137	Maple	Simulation	2	agg	500	455	0.3
138	Maple	Simulation	2	agg	500	3510	0.3
139	Maple	Simulation	2	agg	500	9902	0.2
140	Maple	Simulation	2	agg	500	8128	0.5
141	Maple	Simulation	2	agg	1k	6715	0.5
142	Maple	Simulation	2	agg	1k	1877	0.45
143	Maple	Simulation	2	agg	1k	7070	0.45
144	Maple	Simulation	2	agg	1k	5633	0.45
145	Maple	Simulation	2	agg	1k	1526	0.4
146	Maple	Simulation	2	agg	1k	1016	0.45
147	Maple	Simulation	2	agg	1k	6207	0.55
148	Maple	Simulation	2	agg	1k	9646	0.65
149	Maple	Simulation	2	agg	1k	763	0.4
150	Maple	Simulation	2	agg	1k	2947	0.5
151	Maple	Simulation	2	agg	1k	4528	0.6
152	Maple	Simulation	2	agg	1k	5718	0.55
153	Maple	Simulation	2	agg	1k	2974	0.6
154	Maple	Simulation	2	agg	1k	1997	0.5
155	Maple	Simulation	2	agg	1k	9337	0.4
156	Maple	Simulation	2	agg	1k	2034	0.45
157	Maple	Simulation	2	agg	1k	455	0.45
158	Maple	Simulation	2	agg	1k	3510	0.5
159	Maple	Simulation	2	agg	1k	9902	0.55
160	Maple	Simulation	2	agg	1k	8128	0.4
161	Maple	Simulation	2	agg	5k	6715	0.3
162	Maple	Simulation	2	agg	5k	1877	0.45
163	Maple	Simulation	2	agg	5k	7070	0.45
164	Maple	Simulation	2	agg	5k	5633	0.45
165	Maple	Simulation	2	agg	5k	1526	0.55
166	Maple	Simulation	2	agg	5k	1016	0.55
167	Maple	Simulation	2	agg	5k	6207	0.55
168	Maple	Simulation	2	agg	5k	9646	0.5
169	Maple	Simulation	2	agg	5k	763	0.55
170	Maple	Simulation	2	agg	5k	2947	0.5
171	Maple	Simulation	2	agg	5k	4528	0.45
172	Maple	Simulation	2	agg	5k	5718	0.6
173	Maple	Simulation	2	agg	5k	2974	0.45
174	Maple	Simulation	2	agg	5k	1997	0.7
175	Maple	Simulation	2	agg	5k	9337	0.55
176	Maple	Simulation	2	agg	5k	2034	0.55
177	Maple	Simulation	2	agg	5k	455	0.5
178	Maple	Simulation	2	agg	5k	3510	0.45
179	Maple	Simulation	2	agg	5k	9902	0.55
180	Maple	Simulation	2	agg	5k	8128	0.65
181	Maple	Simulation	2	agg	10k	6715	0.55
182	Maple	Simulation	2	agg	10k	1877	0.55
183	Maple	Simulation	2	agg	10k	7070	0.35
184	Maple	Simulation	2	agg	10k	5633	0.6
185	Maple	Simulation	2	agg	10k	1526	0.5
186	Maple	Simulation	2	agg	10k	1016	0.6
187	Maple	Simulation	2	agg	10k	6207	0.65
188	Maple	Simulation	2	agg	10k	9646	0.5
189	Maple	Simulation	2	agg	10k	763	0.55
190	Maple	Simulation	2	agg	10k	2947	0.55
191	Maple	Simulation	2	agg	10k	4528	0.95
192	Maple	Simulation	2	agg	10k	5718	0.45
193	Maple	Simulation	2	agg	10k	2974	0.55
194	Maple	Simulation	2	agg	10k	1997	0.55
195	Maple	Simulation	2	agg	10k	9337	0.65
196	Maple	Simulation	2	agg	10k	2034	0.65
197	Maple	Simulation	2	agg	10k	455	0.7
198	Maple	Simulation	2	agg	10k	3510	0.45
199	Maple	Simulation	2	agg	10k	9902	0.7
200	Maple	Simulation	2	agg	10k	8128	0.6
201	Maple	Simulation	2	agg	50k	6715	0.6
202	Maple	Simulation	2	agg	50k	1877	0.5
203	Maple	Simulation	2	agg	50k	7070	0.6
204	Maple	Simulation	2	agg	50k	5633	0.45
205	Maple	Simulation	2	agg	50k	1526	0.65
206	Maple	Simulation	2	agg	50k	1016	0.5
207	Maple	Simulation	2	agg	50k	6207	0.5
208	Maple	Simulation	2	agg	50k	9646	0.7
209	Maple	Simulation	2	agg	50k	763	0.55
210	Maple	Simulation	2	agg	50k	2947	0.55
211	Maple	Simulation	2	agg	50k	4528	0.8
212	Maple	Simulation	2	agg	50k	5718	0.65
213	Maple	Simulation	2	agg	50k	2974	0.7
214	Maple	Simulation	2	agg	50k	1997	0.65
215	Maple	Simulation	2	agg	50k	9337	0.5
216	Maple	Simulation	2	agg	50k	2034	0.6
217	Maple	Simulation	2	agg	50k	455	0.5
218	Maple	Simulation	2	agg	50k	3510	0.6
219	Maple	Simulation	2	agg	50k	9902	0.6
220	Maple	Simulation	2	agg	50k	8128	0.45
221	Maple	Simulation	2	agg	200k	6715	0.4
222	Maple	Simulation	2	agg	200k	1877	0.55
223	Maple	Simulation	2	agg	200k	7070	0.7
224	Maple	Simulation	2	agg	200k	5633	0.55
225	Maple	Simulation	2	agg	200k	1526	0.5
226	Maple	Simulation	2	agg	200k	1016	0.5
227	Maple	Simulation	2	agg	200k	6207	0.85
228	Maple	Simulation	2	agg	200k	9646	0.55
229	Maple	Simulation	2	agg	200k	763	1
230	Maple	Simulation	2	agg	200k	2947	0.4
231	Maple	Simulation	2	agg	200k	4528	0.75
232	Maple	Simulation	2	agg	200k	5718	0.9
233	Maple	Simulation	2	agg	200k	2974	0.65
234	Maple	Simulation	2	agg	200k	1997	0.5
235	Maple	Simulation	2	agg	200k	9337	0.85
236	Maple	Simulation	2	agg	200k	2034	0.7
237	Maple	Simulation	2	agg	200k	455	0.55
238	Maple	Simulation	2	agg	200k	3510	0.85
239	Maple	Simulation	2	agg	200k	9902	0.8
240	Maple	Simulation	2	agg	200k	8128	0.65
241	Maple	Simulation	2	forag	500	6715	7
242	Maple	Simulation	2	forag	500	1877	19
243	Maple	Simulation	2	forag	500	7070	19
244	Maple	Simulation	2	forag	500	5633	19
245	Maple	Simulation	2	forag	500	1526	14
246	Maple	Simulation	2	forag	500	1016	20
247	Maple	Simulation	2	forag	500	6207	5
248	Maple	Simulation	2	forag	500	9646	7
249	Maple	Simulation	2	forag	500	763	13
250	Maple	Simulation	2	forag	500	2947	27
251	Maple	Simulation	2	forag	500	4528	22
252	Maple	Simulation	2	forag	500	5718	18
253	Maple	Simulation	2	forag	500	2974	20
254	Maple	Simulation	2	forag	500	1997	12
255	Maple	Simulation	2	forag	500	9337	30
256	Maple	Simulation	2	forag	500	2034	21
257	Maple	Simulation	2	forag	500	455	22
258	Maple	Simulation	2	forag	500	3510	12
259	Maple	Simulation	2	forag	500	9902	22
260	Maple	Simulation	2	forag	500	8128	19
261	Maple	Simulation	2	forag	1k	6715	28
262	Maple	Simulation	2	forag	1k	1877	22
263	Maple	Simulation	2	forag	1k	7070	14
264	Maple	Simulation	2	forag	1k	5633	22
265	Maple	Simulation	2	forag	1k	1526	24
266	Maple	Simulation	2	forag	1k	1016	26
267	Maple	Simulation	2	forag	1k	6207	23
268	Maple	Simulation	2	forag	1k	9646	15
269	Maple	Simulation	2	forag	1k	763	23
270	Maple	Simulation	2	forag	1k	2947	15
271	Maple	Simulation	2	forag	1k	4528	18
272	Maple	Simulation	2	forag	1k	5718	16
273	Maple	Simulation	2	forag	1k	2974	18
274	Maple	Simulation	2	forag	1k	1997	15
275	Maple	Simulation	2	forag	1k	9337	19
276	Maple	Simulation	2	forag	1k	2034	20
277	Maple	Simulation	2	forag	1k	455	19
278	Maple	Simulation	2	forag	1k	3510	25
279	Maple	Simulation	2	forag	1k	9902	19
280	Maple	Simulation	2	forag	1k	8128	16
281	Maple	Simulation	2	forag	5k	6715	25
282	Maple	Simulation	2	forag	5k	1877	27
283	Maple	Simulation	2	forag	5k	7070	25
284	Maple	Simulation	2	forag	5k	5633	40
285	Maple	Simulation	2	forag	5k	1526	19
286	Maple	Simulation	2	forag	5k	1016	24
287	Maple	Simulation	2	forag	5k	6207	35
288	Maple	Simulation	2	forag	5k	9646	13
289	Maple	Simulation	2	forag	5k	763	30
290	Maple	Simulation	2	forag	5k	2947	30
291	Maple	Simulation	2	forag	5k	4528	26
292	Maple	Simulation	2	forag	5k	5718	33
293	Maple	Simulation	2	forag	5k	2974	20
294	Maple	Simulation	2	forag	5k	1997	24
295	Maple	Simulation	2	forag	5k	9337	24
296	Maple	Simulation	2	forag	5k	2034	28
297	Maple	Simulation	2	forag	5k	455	25
298	Maple	Simulation	2	forag	5k	3510	20
299	Maple	Simulation	2	forag	5k	9902	21
300	Maple	Simulation	2	forag	5k	8128	16
301	Maple	Simulation	2	forag	10k	6715	27
302	Maple	Simulation	2	forag	10k	1877	23
303	Maple	Simulation	2	forag	10k	7070	25
304	Maple	Simulation	2	forag	10k	5633	23
305	Maple	Simulation	2	forag	10k	1526	16
306	Maple	Simulation	2	forag	10k	1016	24
307	Maple	Simulation	2	forag	10k	6207	28
308	Maple	Simulation	2	forag	10k	9646	34
309	Maple	Simulation	2	forag	10k	763	24
310	Maple	Simulation	2	forag	10k	2947	22
311	Maple	Simulation	2	forag	10k	4528	20
312	Maple	Simulation	2	forag	10k	5718	25
313	Maple	Simulation	2	forag	10k	2974	24
314	Maple	Simulation	2	forag	10k	1997	26
315	Maple	Simulation	2	forag	10k	9337	27
316	Maple	Simulation	2	forag	10k	2034	26
317	Maple	Simulation	2	forag	10k	455	24
318	Maple	Simulation	2	forag	10k	3510	28
319	Maple	Simulation	2	forag	10k	9902	25
320	Maple	Simulation	2	forag	10k	8128	34
321	Maple	Simulation	2	forag	50k	6715	27
322	Maple	Simulation	2	forag	50k	1877	22
323	Maple	Simulation	2	forag	50k	7070	27
324	Maple	Simulation	2	forag	50k	5633	35
325	Maple	Simulation	2	forag	50k	1526	28
326	Maple	Simulation	2	forag	50k	1016	28
327	Maple	Simulation	2	forag	50k	6207	28
328	Maple	Simulation	2	forag	50k	9646	28
329	Maple	Simulation	2	forag	50k	763	27
330	Maple	Simulation	2	forag	50k	2947	28
331	Maple	Simulation	2	forag	50k	4528	28
332	Maple	Simulation	2	forag	50k	5718	28
333	Maple	Simulation	2	forag	50k	2974	26
334	Maple	Simulation	2	forag	50k	1997	26
335	Maple	Simulation	2	forag	50k	9337	23
336	Maple	Simulation	2	forag	50k	2034	24
337	Maple	Simulation	2	forag	50k	455	23
338	Maple	Simulation	2	forag	50k	3510	19
339	Maple	Simulation	2	forag	50k	9902	26
340	Maple	Simulation	2	forag	50k	8128	23
341	Maple	Simulation	2	forag	200k	6715	25
342	Maple	Simulation	2	forag	200k	1877	28
343	Maple	Simulation	2	forag	200k	7070	27
344	Maple	Simulation	2	forag	200k	5633	29
345	Maple	Simulation	2	forag	200k	1526	30
346	Maple	Simulation	2	forag	200k	1016	36
347	Maple	Simulation	2	forag	200k	6207	35
348	Maple	Simulation	2	forag	200k	9646	31
349	Maple	Simulation	2	forag	200k	763	26
350	Maple	Simulation	2	forag	200k	2947	31
351	Maple	Simulation	2	forag	200k	4528	33
352	Maple	Simulation	2	forag	200k	5718	33
353	Maple	Simulation	2	forag	200k	2974	29
354	Maple	Simulation	2	forag	200k	1997	30
355	Maple	Simulation	2	forag	200k	9337	28
356	Maple	Simulation	2	forag	200k	2034	29
357	Maple	Simulation	2	forag	200k	455	29
358	Maple	Simulation	2	forag	200k	3510	37
359	Maple	Simulation	2	forag	200k	9902	31
360	Maple	Simulation	2	forag	200k	8128	26
361	Chocolate	Simulation	2	agg	500	6715	0.5
362	Chocolate	Simulation	2	agg	500	1877	0.55
363	Chocolate	Simulation	2	agg	500	7070	0.5
364	Chocolate	Simulation	2	agg	500	5633	0.35
365	Chocolate	Simulation	2	agg	500	1526	0.25
366	Chocolate	Simulation	2	agg	500	1016	0.4
367	Chocolate	Simulation	2	agg	500	6207	0.7
368	Chocolate	Simulation	2	agg	500	9646	0.2
369	Chocolate	Simulation	2	agg	500	763	0.55
370	Chocolate	Simulation	2	agg	500	2947	0.4
371	Chocolate	Simulation	2	agg	500	4528	0
372	Chocolate	Simulation	2	agg	500	5718	0.15
373	Chocolate	Simulation	2	agg	500	2974	0.55
374	Chocolate	Simulation	2	agg	500	1997	0.4
375	Chocolate	Simulation	2	agg	500	9337	0.45
376	Chocolate	Simulation	2	agg	500	2034	0.35
377	Chocolate	Simulation	2	agg	500	455	0.55
378	Chocolate	Simulation	2	agg	500	3510	0
379	Chocolate	Simulation	2	agg	500	9902	0.45
380	Chocolate	Simulation	2	agg	500	8128	0.45
381	Chocolate	Simulation	2	agg	1k	6715	0.45
382	Chocolate	Simulation	2	agg	1k	1877	0.4
383	Chocolate	Simulation	2	agg	1k	7070	0.45
384	Chocolate	Simulation	2	agg	1k	5633	0.4
385	Chocolate	Simulation	2	agg	1k	1526	0.45
386	Chocolate	Simulation	2	agg	1k	1016	0.2
387	Chocolate	Simulation	2	agg	1k	6207	0.35
388	Chocolate	Simulation	2	agg	1k	9646	0.2
389	Chocolate	Simulation	2	agg	1k	763	0.6
390	Chocolate	Simulation	2	agg	1k	2947	0.55
391	Chocolate	Simulation	2	agg	1k	4528	0
392	Chocolate	Simulation	2	agg	1k	5718	0.3
393	Chocolate	Simulation	2	agg	1k	2974	0.55
394	Chocolate	Simulation	2	agg	1k	1997	0.45
395	Chocolate	Simulation	2	agg	1k	9337	0.1
396	Chocolate	Simulation	2	agg	1k	2034	0.1
397	Chocolate	Simulation	2	agg	1k	455	0.6
398	Chocolate	Simulation	2	agg	1k	3510	0.65
399	Chocolate	Simulation	2	agg	1k	9902	0.4
400	Chocolate	Simulation	2	agg	1k	8128	0.4
401	Chocolate	Simulation	2	agg	5k	6715	0.5
402	Chocolate	Simulation	2	agg	5k	1877	0.55
403	Chocolate	Simulation	2	agg	5k	7070	0.45
404	Chocolate	Simulation	2	agg	5k	5633	0
405	Chocolate	Simulation	2	agg	5k	1526	0.3
406	Chocolate	Simulation	2	agg	5k	1016	0.35
407	Chocolate	Simulation	2	agg	5k	6207	0.8
408	Chocolate	Simulation	2	agg	5k	9646	0.2
409	Chocolate	Simulation	2	agg	5k	763	0.6
410	Chocolate	Simulation	2	agg	5k	2947	0.45
411	Chocolate	Simulation	2	agg	5k	4528	0.1
412	Chocolate	Simulation	2	agg	5k	5718	0.2
413	Chocolate	Simulation	2	agg	5k	2974	0.55
414	Chocolate	Simulation	2	agg	5k	1997	0.45
415	Chocolate	Simulation	2	agg	5k	9337	0.2
416	Chocolate	Simulation	2	agg	5k	2034	0.25
417	Chocolate	Simulation	2	agg	5k	455	0.6
418	Chocolate	Simulation	2	agg	5k	3510	0.35
419	Chocolate	Simulation	2	agg	5k	9902	0.4
420	Chocolate	Simulation	2	agg	5k	8128	0.5
421	Chocolate	Simulation	2	agg	10k	6715	0.5
422	Chocolate	Simulation	2	agg	10k	1877	0.4
423	Chocolate	Simulation	2	agg	10k	7070	0.35
424	Chocolate	Simulation	2	agg	10k	5633	0.15
425	Chocolate	Simulation	2	agg	10k	1526	0.45
426	Chocolate	Simulation	2	agg	10k	1016	0.4
427	Chocolate	Simulation	2	agg	10k	6207	0.85
428	Chocolate	Simulation	2	agg	10k	9646	0.3
429	Chocolate	Simulation	2	agg	10k	763	0.6
430	Chocolate	Simulation	2	agg	10k	2947	0.25
431	Chocolate	Simulation	2	agg	10k	4528	0.7
432	Chocolate	Simulation	2	agg	10k	5718	0.5
433	Chocolate	Simulation	2	agg	10k	2974	0.6
434	Chocolate	Simulation	2	agg	10k	1997	0.8
435	Chocolate	Simulation	2	agg	10k	9337	0.55
436	Chocolate	Simulation	2	agg	10k	2034	0.55
437	Chocolate	Simulation	2	agg	10k	455	0.55
438	Chocolate	Simulation	2	agg	10k	3510	0.6
439	Chocolate	Simulation	2	agg	10k	9902	0.65
440	Chocolate	Simulation	2	agg	10k	8128	0.4
441	Chocolate	Simulation	2	agg	50k	6715	0.65
442	Chocolate	Simulation	2	agg	50k	1877	0.65
443	Chocolate	Simulation	2	agg	50k	7070	0.7
444	Chocolate	Simulation	2	agg	50k	5633	0.5
445	Chocolate	Simulation	2	agg	50k	1526	0.75
446	Chocolate	Simulation	2	agg	50k	1016	0.15
447	Chocolate	Simulation	2	agg	50k	6207	0.5
448	Chocolate	Simulation	2	agg	50k	9646	0.55
449	Chocolate	Simulation	2	agg	50k	763	0.65
450	Chocolate	Simulation	2	agg	50k	2947	0.5
451	Chocolate	Simulation	2	agg	50k	4528	0.25
452	Chocolate	Simulation	2	agg	50k	5718	0.5
453	Chocolate	Simulation	2	agg	50k	2974	0.5
454	Chocolate	Simulation	2	agg	50k	1997	0.55
455	Chocolate	Simulation	2	agg	50k	9337	0.6
456	Chocolate	Simulation	2	agg	50k	2034	0.6
457	Chocolate	Simulation	2	agg	50k	455	0.7
458	Chocolate	Simulation	2	agg	50k	3510	0.75
459	Chocolate	Simulation	2	agg	50k	9902	0.6
460	Chocolate	Simulation	2	agg	50k	8128	0.35
461	Chocolate	Simulation	2	agg	200k	6715	0.55
462	Chocolate	Simulation	2	agg	200k	1877	0.55
463	Chocolate	Simulation	2	agg	200k	7070	0.95
464	Chocolate	Simulation	2	agg	200k	5633	0.75
465	Chocolate	Simulation	2	agg	200k	1526	0.6
466	Chocolate	Simulation	2	agg	200k	1016	0.3
467	Chocolate	Simulation	2	agg	200k	6207	0.95
468	Chocolate	Simulation	2	agg	200k	9646	0.85
469	Chocolate	Simulation	2	agg	200k	763	0.7
470	Chocolate	Simulation	2	agg	200k	2947	0.55
471	Chocolate	Simulation	2	agg	200k	4528	0.9
472	Chocolate	Simulation	2	agg	200k	5718	0.65
473	Chocolate	Simulation	2	agg	200k	2974	0.55
474	Chocolate	Simulation	2	agg	200k	1997	0.5
475	Chocolate	Simulation	2	agg	200k	9337	0.55
476	Chocolate	Simulation	2	agg	200k	2034	0.2
477	Chocolate	Simulation	2	agg	200k	455	0.6
478	Chocolate	Simulation	2	agg	200k	3510	0.7
479	Chocolate	Simulation	2	agg	200k	9902	0.5
480	Chocolate	Simulation	2	agg	200k	8128	0.7
481	Chocolate	Simulation	2	forag	500	6715	13
482	Chocolate	Simulation	2	forag	500	1877	17
483	Chocolate	Simulation	2	forag	500	7070	18
484	Chocolate	Simulation	2	forag	500	5633	14
485	Chocolate	Simulation	2	forag	500	1526	18
486	Chocolate	Simulation	2	forag	500	1016	20
487	Chocolate	Simulation	2	forag	500	6207	15
488	Chocolate	Simulation	2	forag	500	9646	19
489	Chocolate	Simulation	2	forag	500	763	2
490	Chocolate	Simulation	2	forag	500	2947	21
491	Chocolate	Simulation	2	forag	500	4528	14
492	Chocolate	Simulation	2	forag	500	5718	21
493	Chocolate	Simulation	2	forag	500	2974	20
494	Chocolate	Simulation	2	forag	500	1997	14
495	Chocolate	Simulation	2	forag	500	9337	21
496	Chocolate	Simulation	2	forag	500	2034	20
497	Chocolate	Simulation	2	forag	500	455	17
498	Chocolate	Simulation	2	forag	500	3510	21
499	Chocolate	Simulation	2	forag	500	9902	19
500	Chocolate	Simulation	2	forag	500	8128	17
501	Chocolate	Simulation	2	forag	1k	6715	15
502	Chocolate	Simulation	2	forag	1k	1877	30
503	Chocolate	Simulation	2	forag	1k	7070	17
504	Chocolate	Simulation	2	forag	1k	5633	16
505	Chocolate	Simulation	2	forag	1k	1526	19
506	Chocolate	Simulation	2	forag	1k	1016	16
507	Chocolate	Simulation	2	forag	1k	6207	15
508	Chocolate	Simulation	2	forag	1k	9646	21
509	Chocolate	Simulation	2	forag	1k	763	20
510	Chocolate	Simulation	2	forag	1k	2947	17
511	Chocolate	Simulation	2	forag	1k	4528	17
512	Chocolate	Simulation	2	forag	1k	5718	20
513	Chocolate	Simulation	2	forag	1k	2974	17
514	Chocolate	Simulation	2	forag	1k	1997	20
515	Chocolate	Simulation	2	forag	1k	9337	16
516	Chocolate	Simulation	2	forag	1k	2034	13
517	Chocolate	Simulation	2	forag	1k	455	17
518	Chocolate	Simulation	2	forag	1k	3510	21
519	Chocolate	Simulation	2	forag	1k	9902	20
520	Chocolate	Simulation	2	forag	1k	8128	21
521	Chocolate	Simulation	2	forag	5k	6715	32
522	Chocolate	Simulation	2	forag	5k	1877	21
523	Chocolate	Simulation	2	forag	5k	7070	21
524	Chocolate	Simulation	2	forag	5k	5633	17
525	Chocolate	Simulation	2	forag	5k	1526	23
526	Chocolate	Simulation	2	forag	5k	1016	19
527	Chocolate	Simulation	2	forag	5k	6207	16
528	Chocolate	Simulation	2	forag	5k	9646	17
529	Chocolate	Simulation	2	forag	5k	763	20
530	Chocolate	Simulation	2	forag	5k	2947	17
531	Chocolate	Simulation	2	forag	5k	4528	12
532	Chocolate	Simulation	2	forag	5k	5718	17
533	Chocolate	Simulation	2	forag	5k	2974	20
534	Chocolate	Simulation	2	forag	5k	1997	20
535	Chocolate	Simulation	2	forag	5k	9337	19
536	Chocolate	Simulation	2	forag	5k	2034	25
537	Chocolate	Simulation	2	forag	5k	455	20
538	Chocolate	Simulation	2	forag	5k	3510	14
539	Chocolate	Simulation	2	forag	5k	9902	19
540	Chocolate	Simulation	2	forag	5k	8128	19
541	Chocolate	Simulation	2	forag	10k	6715	20
542	Chocolate	Simulation	2	forag	10k	1877	22
543	Chocolate	Simulation	2	forag	10k	7070	18
544	Chocolate	Simulation	2	forag	10k	5633	28
545	Chocolate	Simulation	2	forag	10k	1526	22
546	Chocolate	Simulation	2	forag	10k	1016	19
547	Chocolate	Simulation	2	forag	10k	6207	14
548	Chocolate	Simulation	2	forag	10k	9646	17
549	Chocolate	Simulation	2	forag	10k	763	26
550	Chocolate	Simulation	2	forag	10k	2947	30
551	Chocolate	Simulation	2	forag	10k	4528	20
552	Chocolate	Simulation	2	forag	10k	5718	22
553	Chocolate	Simulation	2	forag	10k	2974	29
554	Chocolate	Simulation	2	forag	10k	1997	17
555	Chocolate	Simulation	2	forag	10k	9337	25
556	Chocolate	Simulation	2	forag	10k	2034	27
557	Chocolate	Simulation	2	forag	10k	455	16
558	Chocolate	Simulation	2	forag	10k	3510	24
559	Chocolate	Simulation	2	forag	10k	9902	21
560	Chocolate	Simulation	2	forag	10k	8128	26
561	Chocolate	Simulation	2	forag	50k	6715	22
562	Chocolate	Simulation	2	forag	50k	1877	35
563	Chocolate	Simulation	2	forag	50k	7070	35
564	Chocolate	Simulation	2	forag	50k	5633	33
565	Chocolate	Simulation	2	forag	50k	1526	24
566	Chocolate	Simulation	2	forag	50k	1016	17
567	Chocolate	Simulation	2	forag	50k	6207	28
568	Chocolate	Simulation	2	forag	50k	9646	25
569	Chocolate	Simulation	2	forag	50k	763	27
570	Chocolate	Simulation	2	forag	50k	2947	21
571	Chocolate	Simulation	2	forag	50k	4528	34
572	Chocolate	Simulation	2	forag	50k	5718	22
573	Chocolate	Simulation	2	forag	50k	2974	34
574	Chocolate	Simulation	2	forag	50k	1997	22
575	Chocolate	Simulation	2	forag	50k	9337	22
576	Chocolate	Simulation	2	forag	50k	2034	25
577	Chocolate	Simulation	2	forag	50k	455	33
578	Chocolate	Simulation	2	forag	50k	3510	29
579	Chocolate	Simulation	2	forag	50k	9902	24
580	Chocolate	Simulation	2	forag	50k	8128	26
581	Chocolate	Simulation	2	forag	200k	6715	35
582	Chocolate	Simulation	2	forag	200k	1877	36
583	Chocolate	Simulation	2	forag	200k	7070	40
584	Chocolate	Simulation	2	forag	200k	5633	38
585	Chocolate	Simulation	2	forag	200k	1526	33
586	Chocolate	Simulation	2	forag	200k	1016	28
587	Chocolate	Simulation	2	forag	200k	6207	36
588	Chocolate	Simulation	2	forag	200k	9646	30
589	Chocolate	Simulation	2	forag	200k	763	29
590	Chocolate	Simulation	2	forag	200k	2947	37
591	Chocolate	Simulation	2	forag	200k	4528	30
592	Chocolate	Simulation	2	forag	200k	5718	42
593	Chocolate	Simulation	2	forag	200k	2974	32
594	Chocolate	Simulation	2	forag	200k	1997	34
595	Chocolate	Simulation	2	forag	200k	9337	33
596	Chocolate	Simulation	2	forag	200k	2034	24
597	Chocolate	Simulation	2	forag	200k	455	41
598	Chocolate	Simulation	2	forag	200k	3510	34
599	Chocolate	Simulation	2	forag	200k	9902	40
600	Chocolate	Simulation	2	forag	200k	8128	29
601	FL	Simulation	3	agg	50k	6715	0.5
602	FL	Simulation	3	agg	50k	1877	0.55
603	FL	Simulation	3	agg	50k	7070	0.65
604	FL	Simulation	3	agg	50k	5633	0.7
605	FL	Simulation	3	agg	50k	1526	0.6
606	FL	Simulation	3	agg	50k	1016	0.55
607	FL	Simulation	3	agg	50k	6207	0.6
608	FL	Simulation	3	agg	50k	9646	0.5
609	FL	Simulation	3	agg	50k	763	0.55
610	FL	Simulation	3	agg	50k	2947	0.9
611	FL	Simulation	3	agg	50k	4528	0.55
612	FL	Simulation	3	agg	50k	5718	0.5
613	FL	Simulation	3	agg	50k	2974	0.45
614	FL	Simulation	3	agg	50k	1997	0.55
615	FL	Simulation	3	agg	50k	9337	0.5
616	FL	Simulation	3	agg	50k	2034	0.5
617	FL	Simulation	3	agg	50k	455	0.5
618	FL	Simulation	3	agg	50k	3510	0.45
619	FL	Simulation	3	agg	50k	9902	0.55
620	FL	Simulation	3	agg	50k	8128	0.5
621	CFN	Simulation	3	agg	50k	6715	0.95
622	CFN	Simulation	3	agg	50k	1877	0.65
623	CFN	Simulation	3	agg	50k	7070	0.65
624	CFN	Simulation	3	agg	50k	5633	0.6
625	CFN	Simulation	3	agg	50k	1526	0.7
626	CFN	Simulation	3	agg	50k	1016	0.8
627	CFN	Simulation	3	agg	50k	6207	0.6
628	CFN	Simulation	3	agg	50k	9646	0.65
629	CFN	Simulation	3	agg	50k	763	0.6
630	CFN	Simulation	3	agg	50k	2947	0.6
631	CFN	Simulation	3	agg	50k	4528	0.35
632	CFN	Simulation	3	agg	50k	5718	0.85
633	CFN	Simulation	3	agg	50k	2974	0.85
634	CFN	Simulation	3	agg	50k	1997	0.65
635	CFN	Simulation	3	agg	50k	9337	0.95
636	CFN	Simulation	3	agg	50k	2034	0.55
637	CFN	Simulation	3	agg	50k	455	0.75
638	CFN	Simulation	3	agg	50k	3510	0.35
639	CFN	Simulation	3	agg	50k	9902	0.65
640	CFN	Simulation	3	agg	50k	8128	0.85
641	Maple	Simulation	3	agg	50k	6715	0.6
642	Maple	Simulation	3	agg	50k	1877	0.5
643	Maple	Simulation	3	agg	50k	7070	0.6
644	Maple	Simulation	3	agg	50k	5633	0.45
645	Maple	Simulation	3	agg	50k	1526	0.65
646	Maple	Simulation	3	agg	50k	1016	0.5
647	Maple	Simulation	3	agg	50k	6207	0.5
648	Maple	Simulation	3	agg	50k	9646	0.7
649	Maple	Simulation	3	agg	50k	763	0.55
650	Maple	Simulation	3	agg	50k	2947	0.55
651	Maple	Simulation	3	agg	50k	4528	0.8
652	Maple	Simulation	3	agg	50k	5718	0.65
653	Maple	Simulation	3	agg	50k	2974	0.7
654	Maple	Simulation	3	agg	50k	1997	0.65
655	Maple	Simulation	3	agg	50k	9337	0.5
656	Maple	Simulation	3	agg	50k	2034	0.6
657	Maple	Simulation	3	agg	50k	455	0.5
658	Maple	Simulation	3	agg	50k	3510	0.6
659	Maple	Simulation	3	agg	50k	9902	0.6
660	Maple	Simulation	3	agg	50k	8128	0.45
661	SP	Simulation	3	agg	50k	6715	0.85
662	SP	Simulation	3	agg	50k	1877	0.5
663	SP	Simulation	3	agg	50k	7070	0.75
664	SP	Simulation	3	agg	50k	5633	0.5
665	SP	Simulation	3	agg	50k	1526	0.5
666	SP	Simulation	3	agg	50k	1016	0.55
667	SP	Simulation	3	agg	50k	6207	0.8
668	SP	Simulation	3	agg	50k	9646	0.7
669	SP	Simulation	3	agg	50k	763	0.6
670	SP	Simulation	3	agg	50k	2947	0.65
671	SP	Simulation	3	agg	50k	4528	0.65
672	SP	Simulation	3	agg	50k	5718	0.6
673	SP	Simulation	3	agg	50k	2974	0.55
674	SP	Simulation	3	agg	50k	1997	0.65
675	SP	Simulation	3	agg	50k	9337	0.6
676	SP	Simulation	3	agg	50k	2034	0.5
677	SP	Simulation	3	agg	50k	455	0.95
678	SP	Simulation	3	agg	50k	3510	0.6
679	SP	Simulation	3	agg	50k	9902	0.7
680	SP	Simulation	3	agg	50k	8128	0.55
681	ND	Simulation	3	agg	50k	6715	0.35
682	ND	Simulation	3	agg	50k	1877	0.85
683	ND	Simulation	3	agg	50k	7070	0.45
684	ND	Simulation	3	agg	50k	5633	0.5
685	ND	Simulation	3	agg	50k	1526	0.7
686	ND	Simulation	3	agg	50k	1016	0.75
687	ND	Simulation	3	agg	50k	6207	0.8
688	ND	Simulation	3	agg	50k	9646	0.55
689	ND	Simulation	3	agg	50k	763	0.7
690	ND	Simulation	3	agg	50k	2947	0.85
691	ND	Simulation	3	agg	50k	4528	0.35
692	ND	Simulation	3	agg	50k	5718	0.75
693	ND	Simulation	3	agg	50k	2974	0.8
694	ND	Simulation	3	agg	50k	1997	0.9
695	ND	Simulation	3	agg	50k	9337	0.5
696	ND	Simulation	3	agg	50k	2034	0.6
697	ND	Simulation	3	agg	50k	455	0.75
698	ND	Simulation	3	agg	50k	3510	0.6
699	ND	Simulation	3	agg	50k	9902	0.65
700	ND	Simulation	3	agg	50k	8128	0.65
701	CC|CA	Simulation	3	agg	50k	6715	0.3
702	CC|CA	Simulation	3	agg	50k	1877	0.5
703	CC|CA	Simulation	3	agg	50k	7070	0.55
704	CC|CA	Simulation	3	agg	50k	5633	0.5
705	CC|CA	Simulation	3	agg	50k	1526	0.55
706	CC|CA	Simulation	3	agg	50k	1016	0.3
707	CC|CA	Simulation	3	agg	50k	6207	0.45
708	CC|CA	Simulation	3	agg	50k	9646	0.35
709	CC|CA	Simulation	3	agg	50k	763	0.55
710	CC|CA	Simulation	3	agg	50k	2947	0.45
711	CC|CA	Simulation	3	agg	50k	4528	0.7
712	CC|CA	Simulation	3	agg	50k	5718	0.45
713	CC|CA	Simulation	3	agg	50k	2974	0.5
714	CC|CA	Simulation	3	agg	50k	1997	0.5
715	CC|CA	Simulation	3	agg	50k	9337	0.5
716	CC|CA	Simulation	3	agg	50k	2034	0.55
717	CC|CA	Simulation	3	agg	50k	455	0.65
718	CC|CA	Simulation	3	agg	50k	3510	0.5
719	CC|CA	Simulation	3	agg	50k	9902	0.25
720	CC|CA	Simulation	3	agg	50k	8128	0.6
721	FL	Simulation	3	forag	50k	6715	21
722	FL	Simulation	3	forag	50k	1877	29
723	FL	Simulation	3	forag	50k	7070	20
724	FL	Simulation	3	forag	50k	5633	20
725	FL	Simulation	3	forag	50k	1526	34
726	FL	Simulation	3	forag	50k	1016	21
727	FL	Simulation	3	forag	50k	6207	23
728	FL	Simulation	3	forag	50k	9646	19
729	FL	Simulation	3	forag	50k	763	21
730	FL	Simulation	3	forag	50k	2947	18
731	FL	Simulation	3	forag	50k	4528	26
732	FL	Simulation	3	forag	50k	5718	18
733	FL	Simulation	3	forag	50k	2974	17
734	FL	Simulation	3	forag	50k	1997	17
735	FL	Simulation	3	forag	50k	9337	12
736	FL	Simulation	3	forag	50k	2034	28
737	FL	Simulation	3	forag	50k	455	15
738	FL	Simulation	3	forag	50k	3510	26
739	FL	Simulation	3	forag	50k	9902	16
740	FL	Simulation	3	forag	50k	8128	15
741	CFN	Simulation	3	forag	50k	6715	18
742	CFN	Simulation	3	forag	50k	1877	17
743	CFN	Simulation	3	forag	50k	7070	23
744	CFN	Simulation	3	forag	50k	5633	19
745	CFN	Simulation	3	forag	50k	1526	19
746	CFN	Simulation	3	forag	50k	1016	15
747	CFN	Simulation	3	forag	50k	6207	21
748	CFN	Simulation	3	forag	50k	9646	16
749	CFN	Simulation	3	forag	50k	763	14
750	CFN	Simulation	3	forag	50k	2947	18
751	CFN	Simulation	3	forag	50k	4528	12
752	CFN	Simulation	3	forag	50k	5718	22
753	CFN	Simulation	3	forag	50k	2974	17
754	CFN	Simulation	3	forag	50k	1997	19
755	CFN	Simulation	3	forag	50k	9337	19
756	CFN	Simulation	3	forag	50k	2034	19
757	CFN	Simulation	3	forag	50k	455	17
758	CFN	Simulation	3	forag	50k	3510	16
759	CFN	Simulation	3	forag	50k	9902	11
760	CFN	Simulation	3	forag	50k	8128	13
761	Maple	Simulation	3	forag	50k	6715	27
762	Maple	Simulation	3	forag	50k	1877	22
763	Maple	Simulation	3	forag	50k	7070	27
764	Maple	Simulation	3	forag	50k	5633	35
765	Maple	Simulation	3	forag	50k	1526	28
766	Maple	Simulation	3	forag	50k	1016	28
767	Maple	Simulation	3	forag	50k	6207	28
768	Maple	Simulation	3	forag	50k	9646	28
769	Maple	Simulation	3	forag	50k	763	27
770	Maple	Simulation	3	forag	50k	2947	28
771	Maple	Simulation	3	forag	50k	4528	28
772	Maple	Simulation	3	forag	50k	5718	28
773	Maple	Simulation	3	forag	50k	2974	26
774	Maple	Simulation	3	forag	50k	1997	26
775	Maple	Simulation	3	forag	50k	9337	23
776	Maple	Simulation	3	forag	50k	2034	24
777	Maple	Simulation	3	forag	50k	455	23
778	Maple	Simulation	3	forag	50k	3510	19
779	Maple	Simulation	3	forag	50k	9902	26
780	Maple	Simulation	3	forag	50k	8128	23
781	SP	Simulation	3	forag	50k	6715	17
782	SP	Simulation	3	forag	50k	1877	22
783	SP	Simulation	3	forag	50k	7070	21
784	SP	Simulation	3	forag	50k	5633	16
785	SP	Simulation	3	forag	50k	1526	20
786	SP	Simulation	3	forag	50k	1016	21
787	SP	Simulation	3	forag	50k	6207	17
788	SP	Simulation	3	forag	50k	9646	24
789	SP	Simulation	3	forag	50k	763	27
790	SP	Simulation	3	forag	50k	2947	24
791	SP	Simulation	3	forag	50k	4528	16
792	SP	Simulation	3	forag	50k	5718	19
793	SP	Simulation	3	forag	50k	2974	23
794	SP	Simulation	3	forag	50k	1997	19
795	SP	Simulation	3	forag	50k	9337	21
796	SP	Simulation	3	forag	50k	2034	22
797	SP	Simulation	3	forag	50k	455	19
798	SP	Simulation	3	forag	50k	3510	19
799	SP	Simulation	3	forag	50k	9902	29
800	SP	Simulation	3	forag	50k	8128	19
801	ND	Simulation	3	forag	50k	6715	28
802	ND	Simulation	3	forag	50k	1877	15
803	ND	Simulation	3	forag	50k	7070	30
804	ND	Simulation	3	forag	50k	5633	23
805	ND	Simulation	3	forag	50k	1526	26
806	ND	Simulation	3	forag	50k	1016	28
807	ND	Simulation	3	forag	50k	6207	32
808	ND	Simulation	3	forag	50k	9646	30
809	ND	Simulation	3	forag	50k	763	36
810	ND	Simulation	3	forag	50k	2947	26
811	ND	Simulation	3	forag	50k	4528	26
812	ND	Simulation	3	forag	50k	5718	24
813	ND	Simulation	3	forag	50k	2974	26
814	ND	Simulation	3	forag	50k	1997	27
815	ND	Simulation	3	forag	50k	9337	24
816	ND	Simulation	3	forag	50k	2034	25
817	ND	Simulation	3	forag	50k	455	25
818	ND	Simulation	3	forag	50k	3510	35
819	ND	Simulation	3	forag	50k	9902	33
820	ND	Simulation	3	forag	50k	8128	29
821	CC|CA	Simulation	3	forag	50k	6715	23
822	CC|CA	Simulation	3	forag	50k	1877	29
823	CC|CA	Simulation	3	forag	50k	7070	32
824	CC|CA	Simulation	3	forag	50k	5633	29
825	CC|CA	Simulation	3	forag	50k	1526	16
826	CC|CA	Simulation	3	forag	50k	1016	31
827	CC|CA	Simulation	3	forag	50k	6207	26
828	CC|CA	Simulation	3	forag	50k	9646	30
829	CC|CA	Simulation	3	forag	50k	763	22
830	CC|CA	Simulation	3	forag	50k	2947	25
831	CC|CA	Simulation	3	forag	50k	4528	25
832	CC|CA	Simulation	3	forag	50k	5718	32
833	CC|CA	Simulation	3	forag	50k	2974	29
834	CC|CA	Simulation	3	forag	50k	1997	30
835	CC|CA	Simulation	3	forag	50k	9337	29
836	CC|CA	Simulation	3	forag	50k	2034	35
837	CC|CA	Simulation	3	forag	50k	455	23
838	CC|CA	Simulation	3	forag	50k	3510	30
839	CC|CA	Simulation	3	forag	50k	9902	30
840	CC|CA	Simulation	3	forag	50k	8128	26
